# Supplementary material
Source: PubMed Central journal article supplement (PMC7788511)

## Supplementary Online Content

Newton ER, Akerman AW, Strassle PD, Kibbe MR. Association of fluoroquinolone use with short-term risk of development of aortic aneurysm. *JAMA Surg*. Published online January 6, 2021. doi:10.1001/jamasurg.2020.6165

**eTable 1.** Generic Names Used to Capture Medications of Interest

**eTable 2.** *ICD-9-CM* and *ICD-10-CM* Codes Used to Capture Baseline Covariates and Indications for Antibiotic Use

**eTable 3.** *ICD-9-CM*, *ICD-10-CM*, and *CPT* Codes Used to Capture Outcomes of Interest

**eTable 4.** Outcomes of Entire Cohort on 90-Day Incidence of Aneurysm After Fluoroquinolone or Active Comparator, Stratified for Subanalysis

**eTable 5.** Association between Fluoroquinolone Use and 90-Day Incidence of Aneurysm Formations After Restricting to Individuals with Indications Identified

**eFigure 1.** Association Between Fluoroquinolone Use and 90-Day Incidence of Aneurysm Formations Stratified by Fluoroquinolone Type

**eFigure 2.** Association Between Fluoroquinolone Use and 90-Day Incidence of Aneurysm Formations Removing Repeated Observations

**eFigure 3.** Association Between Fluoroquinolone Use and 90-Day Incidence of Aneurysm Formations Stratified by Age

**eFigure 4.** Association Between Fluoroquinolone Use and 90-Day Incidence of Aneurysm Formations Stratified by Sex

**eFigure 5.** Association Between Fluoroquinolone Use and 90-Day Incidence of Aneurysm Formations Stratified by Diabetes Status

**eFigure 6.** Association Between Fluoroquinolone Use and 90-Day Incidence of Aneurysm Formations Stratified by Hypertension Status

**eFigure 7.** Association Between Fluoroquinolone Use and 90-Day Incidence of Aneurysm Formations Stratified by Hyperlipidemia Status

This supplementary material has been provided by the authors to give readers additional information about their work.

**eTable 1. Generic Names Used to Capture Medications of Interest**

|                                                                                                                                                                                                          | <b>Generic Name</b>                                                                                                                                                                                                                                                          |
|----------------------------------------------------------------------------------------------------------------------------------------------------------------------------------------------------------|------------------------------------------------------------------------------------------------------------------------------------------------------------------------------------------------------------------------------------------------------------------------------|
| <b>Fluoroquinolones<sup>a</sup></b>                                                                                                                                                                      | Ciprofloxacin, Gemifloxacin, Levofloxacin, Moxifloxacin, Norfloxacin, Ofloxacin                                                                                                                                                                                              |
| <b>Active comparators<sup>a</sup></b>                                                                                                                                                                    | Amoxicillin/Clavulanate, Azithromycin, Cephalexin, Clindamycin, Sulfamethoxazole/Trimethoprim                                                                                                                                                                                |
| <b>Antihypertensives</b>                                                                                                                                                                                 |                                                                                                                                                                                                                                                                              |
| Beta-blockers                                                                                                                                                                                            | Atenolol, Carvedilol, Esmolol, Metoprolol, Nebivolol, Sotalol                                                                                                                                                                                                                |
| ACE inhibitors                                                                                                                                                                                           | Benazepril, Captopril, Enalapril, Lisinopril, Ramipril                                                                                                                                                                                                                       |
| ARBS                                                                                                                                                                                                     | Losartan, Olmesartan, Valsartan                                                                                                                                                                                                                                              |
| Calcium channel blockers                                                                                                                                                                                 | Amlodipine, Diltiazem, Nicardipine, Nifedipine, Nimodipine, Verapamil                                                                                                                                                                                                        |
| Alpha blockers                                                                                                                                                                                           | Doxazosin, Prazosin, Terazosin                                                                                                                                                                                                                                               |
| Central agonists                                                                                                                                                                                         | Clonidine                                                                                                                                                                                                                                                                    |
| Vasodilators                                                                                                                                                                                             | Minoxidil                                                                                                                                                                                                                                                                    |
| Loop diuretics                                                                                                                                                                                           | Bumetanide, Furosemide, Torsemide, Ethacrynic acid                                                                                                                                                                                                                           |
| Other diuretic                                                                                                                                                                                           | Chlorothiazide, Chlorthalidone, Hydrochlorothiazide, Metolazone                                                                                                                                                                                                              |
| <b>Oral diabetic medication</b>                                                                                                                                                                          | Acarbose, Albiglutide, Alogliptin, Canagliflozin, Dapagliflozin, Dulaglutide, Empagliflozin, Exenatide, Glimepiride, Glipizide, Glyburide, Linagliptin, Liraglutide, Metformin, Nateglinide, Pioglitazone, Repaglinide, Rosiglitazone, Sitagliptin, Saxagliptin, Tolbutamide |
| <b>Insulin</b>                                                                                                                                                                                           | Insulin aspart, Insulin detemir, Insulin glargine, Insulin glulisine, Insulin lispro, Insulin human isophane (NPH), Insulin human regular, Insulin human zinc                                                                                                                |
| <b>Lipid-lowering medications</b>                                                                                                                                                                        | Atorvastatin, Cerivastatin, Fenofibrate, Fluvastatin, Gemfibrozil, Lovastatin, Niacin, Pravastatin, Simvastatin                                                                                                                                                              |
| <b>Anticoagulants</b>                                                                                                                                                                                    | Apixaban, Dabigatran, Enoxaparin, Fondaparinux, Heparin, Rivaroxaban, Warfarin                                                                                                                                                                                               |
| <b>Antiplatelets</b>                                                                                                                                                                                     | Clopidogrel, Dipyridamole, Eptifibatide, Prasugrel, Ticagrelor, Ticlodipine                                                                                                                                                                                                  |
| <b>Beta agonist inhalants</b>                                                                                                                                                                            | Albuterol, Budesonide/formoterol fumarate, Formoterol, Fluticasone propionate/salmeterol Xinafoate, Levalbuterol, Metaproterenol, Pirbuterol, Salmeterol                                                                                                                     |
| <b>Corticosteroids (inhaled)</b>                                                                                                                                                                         | Beclomethasone, Budesonide, Ciclesonide, Flunisolide, Fluticasone, Momatasone                                                                                                                                                                                                |
| <b>Anticholinergics (inhaled)</b>                                                                                                                                                                        | Ipratropium bromide, Tiotropium bromide                                                                                                                                                                                                                                      |
| <sup>a</sup> Medication form was restricted to capsules (including extended and delayed release), tablets, powders for suspension/solution, syrups, and tablets (including delayed and extended release) |                                                                                                                                                                                                                                                                              |

**eTable 2. ICD-9-CM and ICD-10-CM Codes Used to Capture Baseline Covariates and Indications for Antibiotic Use**

|                             | ICD-9-CM                                                                                      | ICD-10-CM <sup>a</sup>                                                                                                                                                                                                                                                                                                                                                                                                            |
|-----------------------------|-----------------------------------------------------------------------------------------------|-----------------------------------------------------------------------------------------------------------------------------------------------------------------------------------------------------------------------------------------------------------------------------------------------------------------------------------------------------------------------------------------------------------------------------------|
| <b>CCI components</b>       |                                                                                               |                                                                                                                                                                                                                                                                                                                                                                                                                                   |
| Prior myocardial infarction | 410.00 – 410.92, 412                                                                          | I21.01-I21.A9, I22.0-122.9, 125.2                                                                                                                                                                                                                                                                                                                                                                                                 |
| Congestive heart failure    | 428.0-428.9                                                                                   | I50.01-I50.9                                                                                                                                                                                                                                                                                                                                                                                                                      |
| Peripheral vascular disease | 443.9, 785.4, V43.4                                                                           | E08.52, E09.52, E10.52, E11.52, E13.52, H49.20-H49.23, I70.361-I70.769, I71.00-I71.9, I73.01, I73.9, I96, Z95.820, Z95.828                                                                                                                                                                                                                                                                                                        |
| Cerebrovascular disease     | 430-438.9                                                                                     | G45.0-G46.8, I60.00-I63.9, I65.01-I66.9, I67.1, I67.2, I67.4-I67.7, I67.81, I67.82, I67.41, I67.48, I67.89, I67.9, 168.0-169.998                                                                                                                                                                                                                                                                                                  |
| Dementia                    | 290.0-290.9                                                                                   | F01.50, F01.51, F03.90, F05                                                                                                                                                                                                                                                                                                                                                                                                       |
| COPD                        | 490-496, 500-505, 506.4                                                                       | J40-J47.9, J60-J67.9, J68.4                                                                                                                                                                                                                                                                                                                                                                                                       |
| Connective tissue disease   | 710.0, 710.1, 710.4, 714.0, 714.1, 714.81, 725                                                | M05.00-M06.09, M06.20-M06.39, M06.80-M06.9, M32.0-M32.9, M33.20-M33.29, M34.0-M34.9, M35.3                                                                                                                                                                                                                                                                                                                                        |
| Peptic ulcer disease        | 531.00-534.91                                                                                 | K25.0-K28.9, K56.699                                                                                                                                                                                                                                                                                                                                                                                                              |
| Diabetes                    | <i>Uncomplicated:</i> 250.0-250.3, 250.7<br><br><i>Complicated:</i> 250.4-250.6, 250.8, 250.9 | <i>Uncomplicated:</i> E10.10, E10.11, E10.51-E10.59, E10.641, E10.9, E11.00, E11.01, E11.10, E11.11, E11.51-E11.59, E11.641, E11.69, E11.9, E13.00, E13.01, E13.10, E13.11, E12.51-E13.59, E13.641, E13.9<br><br><i>Complicated:</i> E10.21-E10.29, E10.311-E10.39, E10.40-E10.49, E10.610, E10.65, E10.69, E11.21-E11.29, E11.311-E11.39, E111.40-E11.49, E11.610, E11.65, E13.21-E13.29, E13.311-E13.39, E13.40-E13.49, E13.610 |
| Hemiplegia/paraplegia       | 342.00-342.92, 344.1                                                                          | G37.70, G37.5, G81.00-G81.94                                                                                                                                                                                                                                                                                                                                                                                                      |
| Renal disease               | 582.0-582.9, 583.0-583.7, 585.1-586, 588.0-588.9                                              | N03.0-N03.9, N05.2-N05.9, N06.2-N06.5, N07.2-N07.5, N08, N17.1, N17.2, N18.1-N18.9, N19, N25.0-N25.9                                                                                                                                                                                                                                                                                                                              |
| Liver disease, mild         | 571.2, 571.4, 571.5, 571.6                                                                    | K70.2, K70.30, K70.31, K73.0-K73.9, K74.0, K74.3-K74.69, K75.4                                                                                                                                                                                                                                                                                                                                                                    |
| Liver disease, severe       | 572.2-572.8, 456.0-456.2                                                                      | I85.00-I85.11, K70.41, K71.11, K72.01, K72.10, K72.11, K72.90, K72.91, K76.6, K76.7                                                                                                                                                                                                                                                                                                                                               |
| Cancer                      | 140.0-172.9, 174.0-195.8, 200.00-208.92                                                       | C00.0-C41.9, C43.0-C43.9, C45.0-C45.7, C46.0-C76.8, C81.00-C86.6, C88.2-C88.9, C90.00-C96.Z, D03.0-D03.9, D45                                                                                                                                                                                                                                                                                                                     |
| Metastatic cancer           | 196.0-199.1                                                                                   | C45.9, C77.0-C79.9, C80.0, C80.1                                                                                                                                                                                                                                                                                                                                                                                                  |
| HIV/AIDS                    | 042, 079.53                                                                                   | B20, B97.35                                                                                                                                                                                                                                                                                                                                                                                                                       |
| <b>Other comorbidities</b>  |                                                                                               |                                                                                                                                                                                                                                                                                                                                                                                                                                   |
| Secondary diabetes          | 249.00-249.91                                                                                 | E08.00-E09.9                                                                                                                                                                                                                                                                                                                                                                                                                      |
| Hyperlipidemia              | 272.0, 272.2-272.4, 277.7                                                                     | E78.00, E78.01, E78.2-E78.5, E88.81                                                                                                                                                                                                                                                                                                                                                                                               |
| Vasculopathy                | 290.40-290.43, 357.1                                                                          | I77.1-I77.3, I77.89, I77.9, I87.8, I87.9, I99.8, I99.9, K55.1, K55.8, K55.9, M30.0, M30.2, M30.8, M31.1, M31.5-M31.7                                                                                                                                                                                                                                                                                                              |
| Aneurysmal disease          | 362.14, 414.10, 414.11, 414.19, 417.1, 437.3                                                  | H35.041-H35.043, H35.049, I25.3, I25.41, I28.1, I67.1                                                                                                                                                                                                                                                                                                                                                                             |

|                              |                                                                                                                                                                                                                                           |                                                                                                                                                                                                                                                                                                                                                                                                                                                                                                                        |
|------------------------------|-------------------------------------------------------------------------------------------------------------------------------------------------------------------------------------------------------------------------------------------|------------------------------------------------------------------------------------------------------------------------------------------------------------------------------------------------------------------------------------------------------------------------------------------------------------------------------------------------------------------------------------------------------------------------------------------------------------------------------------------------------------------------|
| Acute rheumatic disease      | 390-392                                                                                                                                                                                                                                   | I00, I01.0-I01.9, I02.0, I02.9                                                                                                                                                                                                                                                                                                                                                                                                                                                                                         |
| Chronic rheumatic disease    | 393, 394.0, 394.1, 395.0-395.9, 396.0, 397.0-398.99                                                                                                                                                                                       | I05.0-I09.9                                                                                                                                                                                                                                                                                                                                                                                                                                                                                                            |
| Hypertension                 | 401.0-405.99                                                                                                                                                                                                                              | I10-I13.2, I15.0-I15.9, I16.0-I16.9, N26.2                                                                                                                                                                                                                                                                                                                                                                                                                                                                             |
| Coronary artery disease      | 411.0-411.89, 414.12, 414.2-414.9                                                                                                                                                                                                         | I20.0, I24.0-I24.9, I25.110, I25.42, I25.5, I25.6, I25.700, I25.710, I25.720, I25.730, I25.750, I25.760, I25.790, I25.82-I25.84, I25.89, I25.9                                                                                                                                                                                                                                                                                                                                                                         |
| Angina                       | 413.0-413.9                                                                                                                                                                                                                               | I20.1, I20.8, I20.9, I25.111, I25.118, I25.119, I25.701, I25.708, I25.709, I25.711, I25.718, I25.719, I25.721, I25.728, I25.729, I25.731, I25.738, I25.739, I25.751, I25.758, I25.759, I25.761, I25.768, I25.769, I25.791, I25.798, I25.799                                                                                                                                                                                                                                                                            |
| Atherosclerosis              | 414.00-414.07, 440.00-440.9                                                                                                                                                                                                               | I25.10, I25.110-I25.119, I25.700-I25.799, I25.810-I25.812, I70.0-I70.92                                                                                                                                                                                                                                                                                                                                                                                                                                                |
| Pulmonary disease            | 415.0-416.9, 417.0, 417.8, 417.9                                                                                                                                                                                                          | I26.01-I27.9, I28.0, I28.8, I28.9, T80.0XXA, T81.718A, T17.72XA, T82.817A, T82.818A                                                                                                                                                                                                                                                                                                                                                                                                                                    |
| Pericarditis                 | 420.0-420.99, 423.0-423.9                                                                                                                                                                                                                 | I30.0-I32, M32.12                                                                                                                                                                                                                                                                                                                                                                                                                                                                                                      |
| Endocarditis                 | 421.0-421.9, 424.90-424.99                                                                                                                                                                                                                | I33.0, I33.9, I38, I39, M2.11                                                                                                                                                                                                                                                                                                                                                                                                                                                                                          |
| Myocarditis                  | 422.0-422.99                                                                                                                                                                                                                              | I40.0, I40.1, I40.8, I40.9, I41                                                                                                                                                                                                                                                                                                                                                                                                                                                                                        |
| Other valve disease          | 424.2, 424.3                                                                                                                                                                                                                              | I34.0-I37.9                                                                                                                                                                                                                                                                                                                                                                                                                                                                                                            |
| Cardiomyopathy               | 425.0-425.9                                                                                                                                                                                                                               | I42.0-I42.9, I43                                                                                                                                                                                                                                                                                                                                                                                                                                                                                                       |
| Arrhythmia                   | 426.2, 427.0-427.9                                                                                                                                                                                                                        | I44.4, I44.5, I44.60, I44.69, I46.2-I47.9, I48.0-I49.9, R00.1                                                                                                                                                                                                                                                                                                                                                                                                                                                          |
| History of brain bleed       | 430-432.9                                                                                                                                                                                                                                 | I60.00-I62.9                                                                                                                                                                                                                                                                                                                                                                                                                                                                                                           |
| VTE                          | 444.01-445.89, 453.2-453.9                                                                                                                                                                                                                | I74.01-I75.89, I82.210-I82.291, I82.3, I82.401-I82.C29,                                                                                                                                                                                                                                                                                                                                                                                                                                                                |
| <b>Indications</b>           |                                                                                                                                                                                                                                           |                                                                                                                                                                                                                                                                                                                                                                                                                                                                                                                        |
| Gastrointestinal             | 001, 003-009, 022.2, 032.9, 039.2, 040.2, 058.1-9, 080, 084, 140, 148, 178, 530.1 – 530.8, 531 – 534, 537.4, 539.01, 550 – 551, 555, 556, 558.1-558.9, 560.0-569.9, 572.0, 577.0, 579.1, 619.1, 685.0, 777.5, 862, 863, 868.1, 946, 999.3 | A00, A02 – A09, A18, A22, K20, K22, K25 – K28, K31.6, K40.1 – K40.4, K41.1-K41.4, K42 – K44, K50.000-K50.1XX, K50.8-K51.01X, K51.012-K51.014, K51.112-K51.114, K51.2 – K51.3, K51.4, K51.5, K51.8 – K51.9XX, K52.0-K52.9, K55.20, K55.21, K56.0-K56.7, K57.00-K57.93, K58.0-58.9, K59.00-K59.9, K60.0-K63.9, K65.0-K66.9, K67, K68.12, K68.19, K68.9, K75.0, K85.92, K90.1, K90.81, K91.1, K91.7, K91.850, K91.858, K91.89, K92.89, K92.9, K94.00-K94.32, N82.3, N99.4, R11.13, R18.8, T28.1-T28.2, T81.539A, Z20, Z22 |
| Streptococcal/staphylococcus | 034.0, 034.1, 035, 038.0-038.2, 320.2, 320.3, 381.0-381.9, 041.00-041.9                                                                                                                                                                   | A38.0-A38.9, A40, A41, A46, A49.01-A49.9, B95.0-B69.89, G00.2, G00.3, J02.0, J03.00, J03.01, L00, M00.00-M00.89, O99.82, Z22.3,                                                                                                                                                                                                                                                                                                                                                                                        |
| Bacterial pneumonia          | 003.22, 011, 481-482.9, 483.0, 484, 485, 486,                                                                                                                                                                                             | A01.03, A15.0, A37, A48.1, A54.84, B77.81, J09X1, J10.00-J11.08, J13-J15.9, J16.0, J17, J18.2, J85.1, J86, J95.851,                                                                                                                                                                                                                                                                                                                                                                                                    |

|                                          |                                                                                                                                                                                                                                                                                                                                                                                                                          |                                                                                                                                                                                                                                                                                                                                                                                                                                                                                                                                                                                                                                                                                                                         |
|------------------------------------------|--------------------------------------------------------------------------------------------------------------------------------------------------------------------------------------------------------------------------------------------------------------------------------------------------------------------------------------------------------------------------------------------------------------------------|-------------------------------------------------------------------------------------------------------------------------------------------------------------------------------------------------------------------------------------------------------------------------------------------------------------------------------------------------------------------------------------------------------------------------------------------------------------------------------------------------------------------------------------------------------------------------------------------------------------------------------------------------------------------------------------------------------------------------|
|                                          | 487.8, 488.01, 488.11, 488.81, 997.3                                                                                                                                                                                                                                                                                                                                                                                     |                                                                                                                                                                                                                                                                                                                                                                                                                                                                                                                                                                                                                                                                                                                         |
| Upper respiratory infection <sup>b</sup> | 006.4, 020, 021, 031-033, 039.1, 040.1, 047.5, 048.8, 049.4, 098.6, 100.0 – 101.4, 108 – 123, 128, 130.4, 136.3, 137.0, 172.0, 174, 188.3, 277.02, 380.1 – 380.2, 382 – 386, 415.12, 461.0-466.19, 472 – 474, 478, 483, 487.1, 491 – 492, 494, 510-511, 513.0, 527, 528, 647.32, 872 – 874, 995.1                                                                                                                        | A06.5, A15.4-9, A18.6, A20.2, A24.1, A31.0, A36, A37, A42 – 43, A54.5, A56.4, A70, A78, B59=59, B90.9, E84.0, E84.9, H60.1 – H60.9, H62.4, H66.0 – H66.93, H67, H70, H72 – 75, H83.0, H95.32, J00, J01.00-J01.91, J02, J03.80, J03.81, J03.90, J03.91, J04.0-J04.31, J05.0-J05.11, J06.0, J06.9, J09 – J11.83, J16.8, J18, J20.0-J20.9, J21.0-J21.9, J22, J31, J32, J35, J39, J41 – J44, J47, J85, J86.9, J90, J91.8, J95.72, K11.2 – K11.3, O74.0, S11.2, T27.3                                                                                                                                                                                                                                                        |
| Urethritis/UTI                           | 078.88, 079.8 – 079.9, 098, 099.4 – 099.9, 131, 137.2, 160.0, 161 – 165, 167, 169.0 – 169.3, 199.49, 595.0-595.9, 597.80, 597.81, 597.89, 599.0, 604.0-604.99, 607.1, 607.2, 608.0, 614 – 616.9, 634 – 637.51, 638.0, 639, 646.5 – 646.6, 647, 658.1 – 658.43, 659.3, 665.3, 670, 672.0, 867, 995.83, 996.64, 996.65                                                                                                     | A06, A18.1, A36.85, A51.31, A54, A56, A59, A63.8, A64, A74.8 – A74.9, N28.8, N30.00-N30.91, N34.1, N34.2, N39.0, N43.1, N45.1-N45.5, N48.1, N49, N70 – N77, N82, N98.0, N99.7, O03 – O04.88, O07, O08, O23.0 – O23.93, O41.1, O42, O71.3, O86.1 – O86.29, O98.2 - O98.3, R82.7, R84.5, R86.5, R87.5, T28.3 – T28.8, T74.2, T76.2, T83.5, Z11.3, Z20.2, Z22.3 – Z22.4, Z87.4400                                                                                                                                                                                                                                                                                                                                          |
| Cholecystitis/BTI                        | 130.5, 574.00-576.9, 864.1, 868.12                                                                                                                                                                                                                                                                                                                                                                                       | A06.5, B58.1, K80.00-K80.81, K81.0-K83.9, K87, K91.5                                                                                                                                                                                                                                                                                                                                                                                                                                                                                                                                                                                                                                                                    |
| Appendicitis                             | 540.0-542, 863.95                                                                                                                                                                                                                                                                                                                                                                                                        | K35.2-K35.89, K36, K37                                                                                                                                                                                                                                                                                                                                                                                                                                                                                                                                                                                                                                                                                                  |
| Pyelonephritis                           | 016.02, 016.06, 590.0-601.9                                                                                                                                                                                                                                                                                                                                                                                              | A02.25, A18.14, A56.01, N10-N13.9, N15.1, N15.9, N16, N20.0-N22, N28.0-N37, N39.0, N39.8, N39.9, N40.0-N41.9, N42.83, N51, N99.110-N99.115, N99.12, N99.510-N99.518, R31.0-R31.9, R80.2, T86.13                                                                                                                                                                                                                                                                                                                                                                                                                                                                                                                         |
| Skin/soft tissue/bone/lymph              | 020.1 – 022.0, 026.9, 027.1, 030 – 032, 037, 039, 040.0, 044.9, 045.2, 066, 068, 076.0, 078.3, 081 – 083, 085.1 – 085.5, 099.3, 102 – 103, 132, 137.3, 150 – 152, 155.0 – 159.6, 170.0 – 172.5, 174.0 – 177.5, 245, 254, 289, 323, 324.1, 349.31, 370, 373, 374.86, 375 – 377.32, 379.60, 380, 383, 384, 404.2, 408.1, 440.24, 451, 457.2, 478.21, 513.1, 519, 526.5, 536, 539.81, 572.1, 603.1, 611.0, 664 – 665, 670 – | A01, A02, A18, A20.1, A21.0, A26.0, A26.9, A28.1, A30.9, A31.1, A36.3, A39.84, A40.9, A42.2, A43.1, A44.1, A48, A52.1, A54.4, A57, A58, A66, A69, A71, A77, A79, B55, B85.0 – B85.3, D73.3, E06, E08, E09, E10, E11, E13, E32.1, E36.12, E87, E90.6, E92.05, E92.83, G04 – G06.1, G08, G98, H00.0 – H02.8, H05, H16, H60.0 – H61.039, H70.11, H73.01, H83.01, I26.90, I70.26, I73.01, I76, I80, I88 – I89.1, I96, I97.5, J18.9, J34.0, J36, J85.3, J95.02, J98.51, K04 – K05.2, K12.2, K68.11, K76.1, K95, L01.00 – L05.92, L08.0 – L08.9, L30.3, L60.0, L70.0 – L71.9, L76.12, L88.0 – L89.95, L97.1 – L98.499, M01X, M02.1 – M02.9, M46.20 – M46.58, M54 – M54.09, M60 – M60.9, M65.01 – M65.19, M70, M71.00 – M72.6, |

|          |                                                                                                                                                                                                                                                                                                                                                 |                                                                                                                                                                                                                                                                                                                                                                                                                                                                                                                                                                                                                                                                                                                                                                                                                                                                           |
|----------|-------------------------------------------------------------------------------------------------------------------------------------------------------------------------------------------------------------------------------------------------------------------------------------------------------------------------------------------------|---------------------------------------------------------------------------------------------------------------------------------------------------------------------------------------------------------------------------------------------------------------------------------------------------------------------------------------------------------------------------------------------------------------------------------------------------------------------------------------------------------------------------------------------------------------------------------------------------------------------------------------------------------------------------------------------------------------------------------------------------------------------------------------------------------------------------------------------------------------------------|
|          | 675, 680 – 682, 685 – 686, 695, 703 – 704.8, 706 – 707.9, 711, 723.6, 728 – 729.4, 730, 785.4, 800.5 - 802, 805 – 816.13, 817.1, 818.1, 819.1, 820 - 830.1, 831.1 – 839.9, 851.0 – 854.19, 860.0 – 862.9, 864 – 869.1, 870.0, 872.0 – 887.7, 890 – 897.7, 910 – 917.9, 919, 940 – 949.5, 985, 991, 996.6 – 999.33                               | M75, M79.0 – M79.5, M86.0 – M86.9, N47.6, N48.2, N48.5, N49.2, N49.3, N61, N76, N77, O22, O70.0 – O70.9, O71.4, O86.8 – O88.33, O91, O98.813, S00.0 – S02.9, S05, S08.0X – S12.200B, S162XXA, S20.1 – S22.42XB, S29.021A, S30.8, S31.0 - S32.9, Sd8.232D, S38.3XXA, S39, S39.02, S40.2, S40.8, S41.0 – S42.4, S46.0 – S46.9, S48.0 – S48.9, S50.3, S50.8, S51.0 – S51.8, S52.0 – S52.9, S56.0 – S56.9, S58.0 – S58.9, S60.3 – S60.5, S60.8, S61.0 – S61.5, S62.0 – S62.9, S65.2 – S65.3, S66.0 – S66.929, S68.0 – S68.7, S70.2 – S70.372, S71.0 – S71.15, S72.0 – S72.9, S76.0 – S76.9, S78.0 – S78.9, S80.2, S80.8, S81.0 – S82.92, S86, S88, S90.4 – S90.9, S91.0 – S92.9, S96.0 – S96.9, S98.0 – S98.9, T20.0 – T26.4, T28.0 – T28.5, T30.0 – T34.5, T80.2, T81.5, T84.5 – T84.7, T85.7, T86.8, T87.4, T87.8, W45.0 – W46.1, W53.0 – W59.81, W61, Z18.1 – Z18.9, Z20.8 |
| Ocular   | 017.3, 021.3, 076.1 – 076.9, 077.98, 98.4 – 98.81, 130.1 – 130.2, 132.3, 139.1, 173, 360.0 – 360.19, 363.0 – 364.3, 368.1, 370.01 – 370.55, 373.01 – 373.9, 375.31 – 375.41, 376.0 – 376.3, 377.30, 377.31, 379.61 – 379.63, 802.7, 870.1 – 871.9, 940.2 – 940.9                                                                                | A18.5, A36.86, A54.3, A71, A74.0, B58.0, B60.1, B85.4, E91.4, H01.0 – H02.8, H04.0 – H04.433, H05.011 – H05.53, H16.0 – H16.9, H20.0 – H20.9, H30.0 – H30.23, H44.0 – H44.792, H46.0 – H46.9, H59.2 – H59.4, S00.29A, S01.10, S05.2 – S05.72XS, T26.00 – T26.9                                                                                                                                                                                                                                                                                                                                                                                                                                                                                                                                                                                                            |
| Dental   | 522 – 523, 526, 873.72, V9032                                                                                                                                                                                                                                                                                                                   | A69.1, K04.0- K04.9, K05.0 – K05.32, M27.3, S02.5XXB, Z18.32                                                                                                                                                                                                                                                                                                                                                                                                                                                                                                                                                                                                                                                                                                                                                                                                              |
| Syphilis | 096.0, 090.3 – 092.9, 093.0 – 093.9, 094.2 – 094.9, 095.0 – 095.9, 097.0 – 097.9, 104.0, 647.00 – 647.04                                                                                                                                                                                                                                        | A50.02 – A50.9, A51.0 – A51.9, A52.02 – A52.9, A53.0, A53.9, A65, O98.11 – O98.13                                                                                                                                                                                                                                                                                                                                                                                                                                                                                                                                                                                                                                                                                                                                                                                         |
| Other    | 002.0 – 008.0, 020.0 – 023.9, 026.0 – 027.9, 030.1 – 032.6, 036.0 – 036.9, 038.2 – 039.9, 040.3, 078.2, 081.0 – 083.8, 085.9, 087.0 – 088.9, 094.1, 098.8, 100.0 – 100.9, 101.3, 102.0, 102, 103.1, 104.8, 104.9, 108.0, 130.0 – 139.8, 150.2, 170.6, 179.0 – 180.5, 188.0 – 189.6, 282.4 - 282.69, 288.0, 320.0 – 324.9, 364.0 – 364.2, 368.9, | A01.0 – A01.4, A02.1, A02.8, A06.8 – A06.9, A17.0 – A25.9, A27.0 – A28.9, A31, A32.9, A34 – A36.9, A39.0 – A42.9, A44.0 – A44.9, A48.2 – A48.8, A52.17, A59.8, A66 – A69.9, A75, A77.1 – A77.9, A79.9, B55.9, B58.2, B58.89, B58.9, B60.0 – B60.8, B64, B89, B90.0, B90.8, B94.8,B 94.9, B99.8, B99.9, D57.0 – D57.819, D70.3 – D70.9, E87.2, E87.5, E91.5, G00.0 – G07.0, G97.49, I00.0 – I02.9, I26.01, I30, I32 – I33.9, I38 – I40.9, I70, I73, M02.3, O03, O75.2, O75.3, O85, O86.4, O98.01 – O98.92, R57, R65, R89.5, T28.4, T80.29, T81.1- T81.59, T82, T86.23, T86.43, T86.812, T86.842,                                                                                                                                                                                                                                                                           |

|                                                                                                                                                                                                                                                                                                                                                                                                                                                                                                                             |                                                                                                                                                                                                                  |                                                    |
|-----------------------------------------------------------------------------------------------------------------------------------------------------------------------------------------------------------------------------------------------------------------------------------------------------------------------------------------------------------------------------------------------------------------------------------------------------------------------------------------------------------------------------|------------------------------------------------------------------------------------------------------------------------------------------------------------------------------------------------------------------|----------------------------------------------------|
|                                                                                                                                                                                                                                                                                                                                                                                                                                                                                                                             | 384, 391.0 – 392.9,<br>408.2, 408.9, 420.0 –<br>422.9, 424.9, 517.3,<br>647.3 – 647.9, 659.3,<br>669.1, 670.2, 771.8,<br>785.5, 790.7, 795.3,<br>824.0 – 824.1, 995.5,<br>995.9, 996.6, 998.0 –<br>998.59, 999.3 | T86.93, W45.8, Y64.0, Y64.9, Z20, Z22.2 –<br>Z22.9 |
| Abbreviations: ICD-9-CM, International Classification of Diseases, 9 <sup>th</sup> edition, Clinical Modification; ICD-10-CM, International Classification of Diseases, 10 <sup>th</sup> edition; CCI, Charlson comorbidity index; UTI, urinary tract infection; BTI, biliary tract infection<br><sup>a</sup> ICD-10-CM codes were identified using forward and backward mapping to the Generalized Equivalence Mappings (GEMs) provided by CMS<br><sup>b</sup> Includes pharyngitis, sinusitis, laryngitis, and bronchitis |                                                                                                                                                                                                                  |                                                    |

**eTable 3. ICD-9-CM, ICD-10-CM, and CPT Codes Used to Capture Outcomes of Interest**

|                                                                                                                                                                                                                                                                                                                                                                                                                | <b>ICD-9-CM</b>                                   | <b>ICD-10-CM<sup>a</sup></b>     | <b>CPT</b>                                                                                            |
|----------------------------------------------------------------------------------------------------------------------------------------------------------------------------------------------------------------------------------------------------------------------------------------------------------------------------------------------------------------------------------------------------------------|---------------------------------------------------|----------------------------------|-------------------------------------------------------------------------------------------------------|
| <b>Aortic aneurysm</b>                                                                                                                                                                                                                                                                                                                                                                                         |                                                   |                                  |                                                                                                       |
| Thoracic                                                                                                                                                                                                                                                                                                                                                                                                       | 441.1, 441.2                                      | I71.1, I71.2                     |                                                                                                       |
| Abdominal                                                                                                                                                                                                                                                                                                                                                                                                      | 441.3, 441.4                                      | I71.3, I71.4                     |                                                                                                       |
| Thoracoabdominal                                                                                                                                                                                                                                                                                                                                                                                               | 441.6, 441.7                                      | I71.5, I71.6                     | 0001T, 0002T, 0033T,<br>0035T, 0036T, 0038T,<br>0039T, 0040T, 0078T,<br>0079T, 0080T, 0081T,          |
| Unspecified                                                                                                                                                                                                                                                                                                                                                                                                    | 441.5, 441.9,<br>447.70-447.73                    | I71.8, I71.9                     | 33877, 33880, 33881,<br>34800, 34802, 34803,<br>34804, 34805, 34830,<br>34831, 34832, 75952,<br>75953 |
| <b>Aortic dissection</b>                                                                                                                                                                                                                                                                                                                                                                                       | 441.00-441.03                                     | I71.00-I71.03                    |                                                                                                       |
| <b>Iliac artery aneurysm</b>                                                                                                                                                                                                                                                                                                                                                                                   | 442.2                                             | I72.3                            |                                                                                                       |
| <b>Other abdominal aneurysm</b>                                                                                                                                                                                                                                                                                                                                                                                | 442.1, 442.83,<br>442.84                          | I72.2, I77.810-I77.812,<br>I79.0 |                                                                                                       |
| <b>Other aneurysm</b>                                                                                                                                                                                                                                                                                                                                                                                          | 442.0, 442.3,<br>442.81, 442.82,<br>442.89, 442.9 | I72.0, I72.1, I72.4-I72.9        |                                                                                                       |
| Abbreviations: ICD-9-CM, International Classification of Diseases, 9 <sup>th</sup> edition, Clinical Modification; ICD-10-CM, International Classification of Diseases, 10 <sup>th</sup> edition, Clinical Modification; CPT, current procedural terminology<br><sup>a</sup> ICD-10-CM codes were identified using forward and backward mapping to the Generalized Equivalence Mappings (GEMs) provided by CMS |                                                   |                                  |                                                                                                       |



**eTable 4. Outcomes of Entire Cohort on 90-Day Incidence of Aneurysm After Fluoroquinolone or Active Comparator, Stratified for Subanalysis**

|                                     | Antibiotic Group | n          | Aneurysm      |                 |                          |                           |                                  |                             |                   |                       |                          |                        |                 |
|-------------------------------------|------------------|------------|---------------|-----------------|--------------------------|---------------------------|----------------------------------|-----------------------------|-------------------|-----------------------|--------------------------|------------------------|-----------------|
|                                     |                  |            | Aneurysm      | Aortic Aneurysm | Thoracic Aortic Aneurysm | Abdominal Aortic Aneurysm | Thoracoabdominal Aortic Aneurysm | Unspecified Aortic Aneurysm | Aortic Dissection | Iliac Artery Aneurysm | Other abdominal aneurysm | Other/unknown aneurysm | Aneurysm Repair |
| <b>Overall (n=47,596,545)</b>       | F                | 9,053,961  | 6,752 (0.07)  | 5,110 (0.06)    | 1,127 (0.01)             | 3,067 (0.03)              | 70 (0.00)                        | 1,392 (0.02)                | 366 (0.00)        | 230 (0.00)            | 478 (0.01)               | 959 (0.01)             | 66 (0.00)       |
|                                     | C                | 38,542,584 | 17,627 (0.05) | 13,188 (0.03)   | 3,719 (0.01)             | 6,807 (0.02)              | 237 (0.00)                       | 3,919 (0.01)                | 1,088 (0.00)      | 397 (0.00)            | 880 (0.00)               | 2,988 (0.01)           | 172 (0.00)      |
| <b>Sex</b>                          |                  |            |               |                 |                          |                           |                                  |                             |                   |                       |                          |                        |                 |
| Female (n=28,484,133)               | F                | 550,141    | 2,631 (0.05)  | 1,733 (0.03)    | 358 (0.01)               | 996 (0.02)                | 33 (0.00)                        | 511 (0.01)                  | 149 (0.00)        | 40 (0.00)             | 301 (0.01)               | 532 (0.01)             | 20 (0.00)       |
|                                     | C                | 22,933,922 | 6,776 (0.03)  | 4,387 (0.02)    | 1,170 (0.01)             | 2,231 (0.01)              | 89 (0.00)                        | 1,325 (0.01)                | 417 (0.00)        | 88 (0.00)             | 524 (0.00)               | 1,663 (0.01)           | 46 (0.00)       |
| Male (n=19,112,412)                 | F                | 3,503,820  | 4,121 (0.12)  | 3,377 (0.10)    | 769 (0.02)               | 2,071 (0.06)              | 37 (0.00)                        | 881 (0.03)                  | 217 (0.01)        | 190 (0.01)            | 177 (0.01)               | 427 (0.01)             | 46 (0.00)       |
|                                     | C                | 15,608,592 | 10,851 (0.07) | 8,801 (0.06)    | 2,549 (0.02)             | 4,576 (0.03)              | 148 (0.00)                       | 2,594 (0.02)                | 671 (0.00)        | 309 (0.00)            | 356 (0.00)               | 1,325 (0.01)           | 126 (0.00)      |
| <b>Age</b>                          |                  |            |               |                 |                          |                           |                                  |                             |                   |                       |                          |                        |                 |
| 18-34 (n=14,097,210)                | F                | 2,103,974  | 197 (0.01)    | 127 (0.01)      | 28 (0.00)                | 49 (0.00)                 | 1 (0.00)                         | 62 (0.00)                   | 23 (0.00)         | 1 (0.00)              | 7 (0.00)                 | 48 (0.00)              | 1 (0.00)        |
|                                     | C                | 11,993,236 | 980 (0.01)    | 622 (0.01)      | 187 (0.00)               | 187 (0.00)                | 15 (0.00)                        | 297 (0.00)                  | 79 (0.00)         | 12 (0.00)             | 38 (0.00)                | 265 (0.00)             | 10 (0.00)       |
| 35-49 (n=15,493,370)                | F                | 2,897,767  | 897 (0.03)    | 583 (0.02)      | 159 (0.01)               | 300 (0.01)                | 12 (0.00)                        | 187 (0.01)                  | 75 (0.00)         | 25 (0.00)             | 86 (0.00)                | 187 (0.01)             | 10 (0.00)       |
|                                     | C                | 12,595,603 | 2,949 (0.02)  | 1,926 (0.02)    | 699 (0.01)               | 725 (0.01)                | 41 (0.00)                        | 722 (0.01)                  | 253 (0.00)        | 44 (0.00)             | 137 (0.00)               | 744 (0.01)             | 12 (0.00)       |
| 50-64 (n=18,005,965)                | F                | 4,052,220  | 5,658 (0.14)  | 4,400 (0.11)    | 940 (0.02)               | 2,718 (0.07)              | 57 (0.00)                        | 1,143 (0.03)                | 268 (0.01)        | 204 (0.01)            | 385 (0.01)               | 724 (0.02)             | 92 (0.00)       |
|                                     | C                | 13,953,745 | 13,698 (0.10) | 10,640 (0.08)   | 2,833 (0.02)             | 5,895 (0.04)              | 181 (0.00)                       | 2,900 (0.02)                | 756 (0.01)        | 341 (0.00)            | 705 (0.01)               | 1,979 (0.01)           | 150 (0.00)      |
| <b>Diabetes</b>                     |                  |            |               |                 |                          |                           |                                  |                             |                   |                       |                          |                        |                 |
| No Diabetes Mellitus (n=43,573,891) | F                | 8,147,012  | 5,540 (0.07)  | 4,206 (0.05)    | 980 (0.01)               | 2,478 (0.03)              | 58 (0.00)                        | 1,169 (0.01)                | 301 (0.00)        | 190 (0.00)            | 395 (0.00)               | 770 (0.01)             | 86 (0.00)       |
|                                     | C                | 35,426,879 | 14,888 (0.04) | 11,159 (0.03)   | 3,294 (0.01)             | 5,565 (0.02)              | 200 (0.00)                       | 3,424 (0.01)                | 922 (0.00)        | 333 (0.00)            | 752 (0.00)               | 2,511 (0.01)           | 141 (0.00)      |
| Diagnosis Only (n=806,545)          | F                | 187,647    | 320 (0.17)    | 238 (0.13)      | 41 (0.02)                | 144 (0.08)                | 4 (0.00)                         | 64 (0.03)                   | 21 (0.01)         | 8 (0.00)              | 22 (0.01)                | 51 (0.03)              | 3 (0.00)        |
|                                     | C                | 618,898    | 673 (0.11)    | 508 (0.08)      | 110 (0.02)               | 310 (0.05)                | 11 (0.00)                        | 124 (0.02)                  | 42 (0.01)         | 11 (0.00)             | 23 (0.00)                | 113 (0.02)             | 5 (0.00)        |
| Oral Medications (n=2,365,839)      | F                | 524,049    | 680 (0.13)    | 523 (0.10)      | 81 (0.02)                | 144 (0.08)                | 8 (0.00)                         | 132 (0.03)                  | 33 (0.01)         | 28 (0.01)             | 40 (0.01)                | 94 (0.02)              | 10 (0.00)       |
|                                     | C                | 1,841,790  | 1,525 (0.08)  | 1,144 (0.06)    | 234 (0.01)               | 713 (0.04)                | 19 (0.00)                        | 272 (0.01)                  | 87 (0.00)         | 48 (0.00)             | 71 (0.00)                | 255 (0.01)             | 20 (0.00)       |
| Insulin-Requiring (n=850,270)       | F                | 195,253    | 212 (0.11)    | 143 (0.07)      | 25 (0.01)                | 93 (0.05)                 | 0 (0.00)                         | 27 (0.01)                   | 11 (0.01)         | 4 (0.00)              | 21 (0.01)                | 44 (0.02)              | 4 (0.00)        |
|                                     | C                | 655,017    | 541 (0.08)    | 377 (0.06)      | 81 (0.01)                | 219 (0.03)                | 7 (0.00)                         | 99 (0.02)                   | 37 (0.01)         | 5 (0.00)              | 34 (0.01)                | 109 (0.02)             | 6 (0.00)        |
| <b>Hypertension</b>                 |                  |            |               |                 |                          |                           |                                  |                             |                   |                       |                          |                        |                 |
| No Hypertension (n=35,670,172)      | F                | 6,438,596  | 2,712 (0.04)  | 2,022 (0.03)    | 439 (0.01)               | 1,186 (0.02)              | 25 (0.00)                        | 606 (0.01)                  | 150 (0.00)        | 98 (0.00)             | 197 (0.00)               | 402 (0.01)             | 36 (0.00)       |
|                                     | C                | 29,231,576 | 7,210 (0.02)  | 5,176 (0.02)    | 1,404 (0.00)             | 2,595 (0.01)              | 83 (0.00)                        | 1,689 (0.01)                | 426 (0.00)        | 149 (0.00)            | 371 (0.00)               | 1,425 (0.00)           | 60 (0.00)       |
| Diagnosis Only (n=1,244,636)        | F                | 281,924    | 374 (0.13)    | 278 (0.10)      | 55 (0.02)                | 179 (0.06)                | 1 (0.00)                         | 70 (0.02)                   | 23 (0.01)         | 11 (0.00)             | 29 (0.01)                | 61 (0.02)              | 5 (0.00)        |
|                                     | C                | 962,712    | 850 (0.09)    | 608 (0.06)      | 149 (0.02)               | 328 (0.03)                | 10 (0.00)                        | 191 (0.02)                  | 47 (0.00)         | 23 (0.00)             | 34 (0.00)                | 180 (0.02)             | 9 (0.00)        |
| Oral Medications (n=10,681,737)     | F                | 2,333,441  | 3,666 (0.16)  | 2,810 (0.12)    | 633 (0.03)               | 1,702 (0.07)              | 44 (0.00)                        | 716 (0.03)                  | 193 (0.01)        | 121 (0.01)            | 252 (0.01)               | 496 (0.02)             | 62 (0.00)       |
|                                     | C                | 8,348,296  | 9,567 (0.11)  | 7,404 (0.09)    | 2,166 (0.03)             | 3,884 (0.05)              | 144 (0.00)                       | 2,039 (0.02)                | 615 (0.01)        | 225 (0.00)            | 475 (0.01)               | 1,383 (0.02)           | 103 (0.00)      |
| <b>Hyperlipidemia</b>               |                  |            |               |                 |                          |                           |                                  |                             |                   |                       |                          |                        |                 |
| No Hyperlipidemia (n=38,118,246)    | F                | 6,936,480  | 3,491 (0.05)  | 2,547 (0.04)    | 650 (0.01)               | 1,414 (0.02)              | 36 (0.00)                        | 740 (0.01)                  | 224 (0.00)        | 118 (0.00)            | 259 (0.00)               | 562 (0.01)             | 54 (0.00)       |
|                                     | C                | 31,181,766 | 9,528 (0.03)  | 6,845 (0.02)    | 2,110 (0.01)             | 3,183 (0.01)              | 139 (0.00)                       | 2,277 (0.01)                | 639 (0.00)        | 194 (0.00)            | 519 (0.00)               | 1,837 (0.01)           | 85 (0.00)       |
| Diagnosis Only (n=3,223,729)        | F                | 723,648    | 886 (0.12)    | 695 (0.10)      | 125 (0.02)               | 436 (0.06)                | 10 (0.00)                        | 193 (0.03)                  | 34 (0.00)         | 25 (0.00)             | 63 (0.01)                | 117 (0.02)             | 14 (0.00)       |
|                                     | C                | 2,500,081  | 2,155 (0.09)  | 1,623 (0.06)    | 411 (0.02)               | 871 (0.03)                | 17 (0.00)                        | 465 (0.02)                  | 113 (0.00)        | 55 (0.00)             | 118 (0.00)               | 344 (0.01)             | 19 (0.00)       |
| Oral Medications (n=6,254,570)      | F                | 1,393,833  | 2,375 (0.17)  | 1,868 (0.13)    | 352 (0.03)               | 1,217 (0.09)              | 24 (0.00)                        | 459 (0.03)                  | 108 (0.01)        | 87 (0.01)             | 156 (0.01)               | 280 (0.02)             | 35 (0.00)       |
|                                     | C                | 4,860,737  | 5,944 (0.12)  | 4,720 (0.10)    | 1,198 (0.02)             | 2,753 (0.06)              | 81 (0.00)                        | 1,177 (0.02)                | 337 (0.01)        | 148 (0.00)            | 243 (0.00)               | 1,837 (0.01)           | 68 (0.00)       |
| <b>Antibiotic Type</b>              |                  |            |               |                 |                          |                           |                                  |                             |                   |                       |                          |                        |                 |
| Comparator (38,542,584)             | -                |            | 17,627 (0.05) | 13,188 (0.03)   | 3,719 (0.01)             | 6,807 (0.02)              | 237 (0.00)                       | 3,919 (0.01)                | 1,088 (0.00)      | 397 (0.00)            | 880 (0.00)               | 2,988 (0.01)           | 172 (0.00)      |
| Ciprofloxacin (5,190,117)           | -                |            | 3,656 (0.07)  | 2,717 (0.05)    | 539 (0.01)               | 1,683 (0.03)              | 40 (0.00)                        | 719 (0.01)                  | 186 (0.00)        | 147 (0.00)            | 320 (0.01)               | 501 (0.01)             | 67 (0.00)       |
| Levofloxacin (2,465,316)            | -                |            | 2,267 (0.09)  | 1,762 (0.07)    | 450 (0.02)               | 995 (0.04)                | 25 (0.00)                        | 506 (0.02)                  | 129 (0.01)        | 68 (0.00)             | 123 (0.00)               | 317 (0.01)             | 30 (0.00)       |
| Moxifloxacin (1,073,082)            | -                |            | 670 (0.06)    | 514 (0.05)      | 108 (0.01)               | 323 (0.03)                | 5 (0.00)                         | 137 (0.01)                  | 44 (0.00)         | 11 (0.00)             | 32 (0.00)                | 108 (0.01)             | 6 (0.00)        |
| Other FQ (326,446)                  | -                |            | 159 (0.05)    | 117 (0.04)      | 30 (0.01)                | 66 (0.02)                 | 0 (0.00)                         | 30 (0.01)                   | 7 (0.00)          | 4 (0.00)              | 3 (0.00)                 | 33 (0.01)              | 0 (0.00)        |

**eTable 5. Association between Fluoroquinolone Use and 90-Day Incidence of Aneurysm Formations After Restricting to Individuals with Indications Identified**

|                              | <b>HR (95% CI)<sup>a</sup></b> | <b>p-value</b> |
|------------------------------|--------------------------------|----------------|
| <b>Aneurysm<sup>b</sup></b>  | 1.22 (1.16, 1.29)              | <0.0001        |
| Aortic aneurysm <sup>b</sup> | 1.25 (1.17, 1.33)              | <0.0001        |
| Thoracic                     | 1.24 (1.09, 1.40)              | 0.001          |
| Abdominal                    | 1.26 (1.16, 1.37)              | <0.0001        |
| Thoracoabdominal             | 0.66 (0.40, 1.07)              | 0.09           |
| Unspecified                  | 1.28 (1.14, 1.44)              | <0.0001        |
| Aortic dissection            | 1.10 (0.87, 1.38)              | 0.43           |
| Iliac artery aneurysm        | 1.23 (0.89, 1.70)              | 0.20           |
| Other abdominal aneurysm     | 1.22 (0.99, 1.51)              | 0.06           |
| Other/unknown aneurysm       | 1.19 (1.04, 1.36)              | 0.01           |
| <b>Aneurysm surgery</b>      | 2.47 (1.56, 3.91)              | <0.0001        |

Abbreviations: FQ, fluoroquinolone; HR, hazard ratio; CI, confidence interval

<sup>a</sup> Inverse-probability of treatment weights were used to account for potential confounding; weights and repeated observations were accounted for using robust sandwich estimators

<sup>b</sup> Adults were able to have multiple aneurysm diagnoses during follow-up; total may be less than the sum of its parts

### eFigure 1. Association Between Fluoroquinolone Use and 90-Day Incidence of Aneurysm Formations Stratified by Fluoroquinolone Type

Effect of fluoroquinolone use, compared to active comparators, on 90-day incidence of aneurysm (including aortic dissection) stratified by specific fluoroquinolone. Inverse-probability of treatment weights were used to account for potential confounding; weights and repeated observations were accounted for using robust sandwich estimators. Wald Chi-square test assessing potential effect measure modification by fluoroquinolone status. Abbreviations used: <sup>a</sup>Ciprofloxacin, <sup>b</sup>Levofloxacin, <sup>c</sup>Moxifloxacin. \*P-value comparing at each sub-category level between fluoroquinolone type.

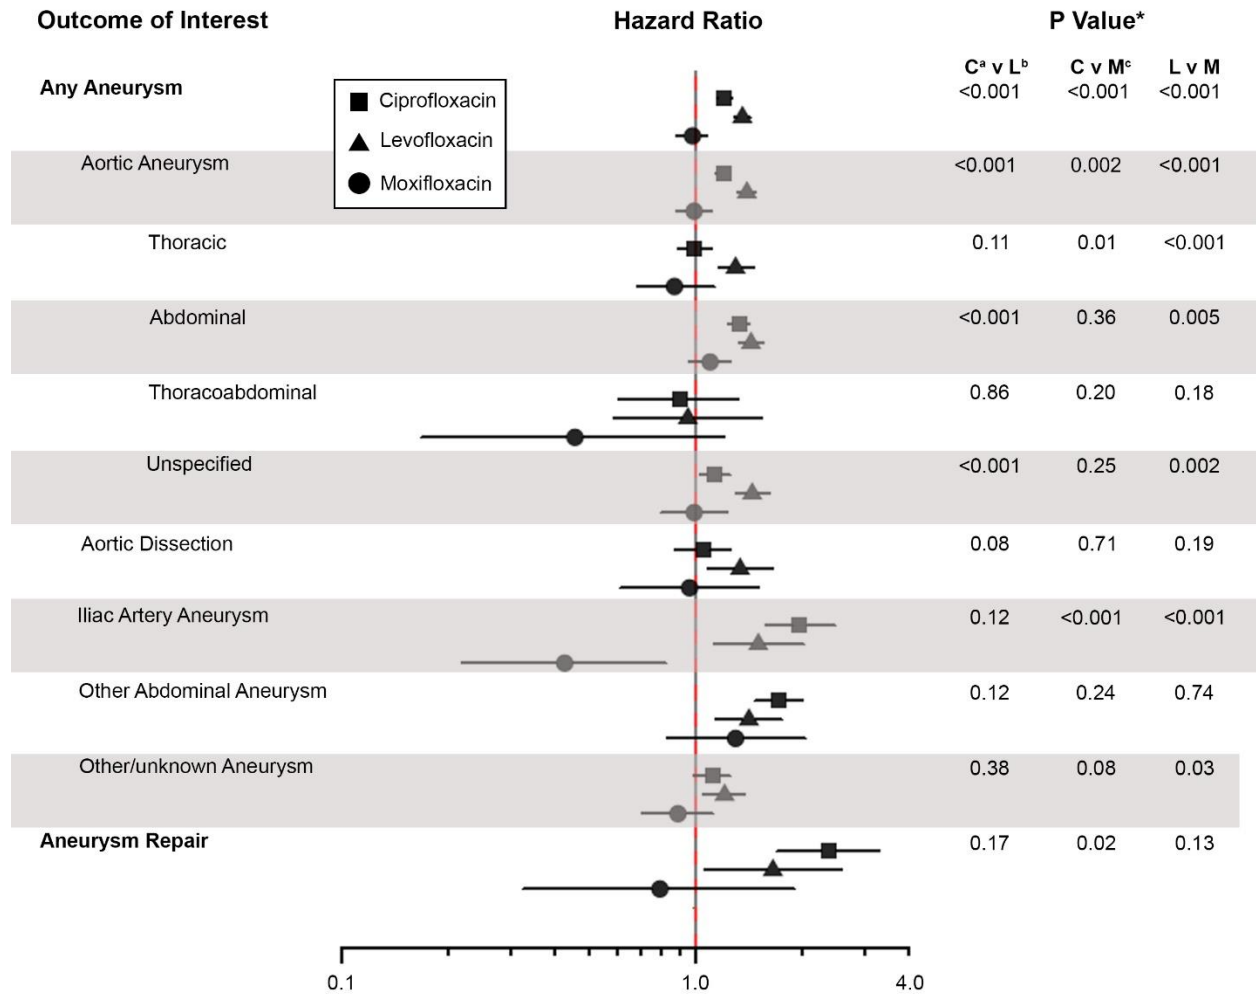

## eFigure 2. Association Between Fluoroquinolone Use and 90-Day Incidence of Aneurysm Formations Removing Repeated Observations

Effect of fluoroquinolone use, compared to active comparators, on 90-day incidence of aneurysm; antibiotic fills (fluoroquinolone or antibiotic comparator) after an episode with an aneurysm event were excluded (13,732 fills, 238 additional aneurysm events were removed).

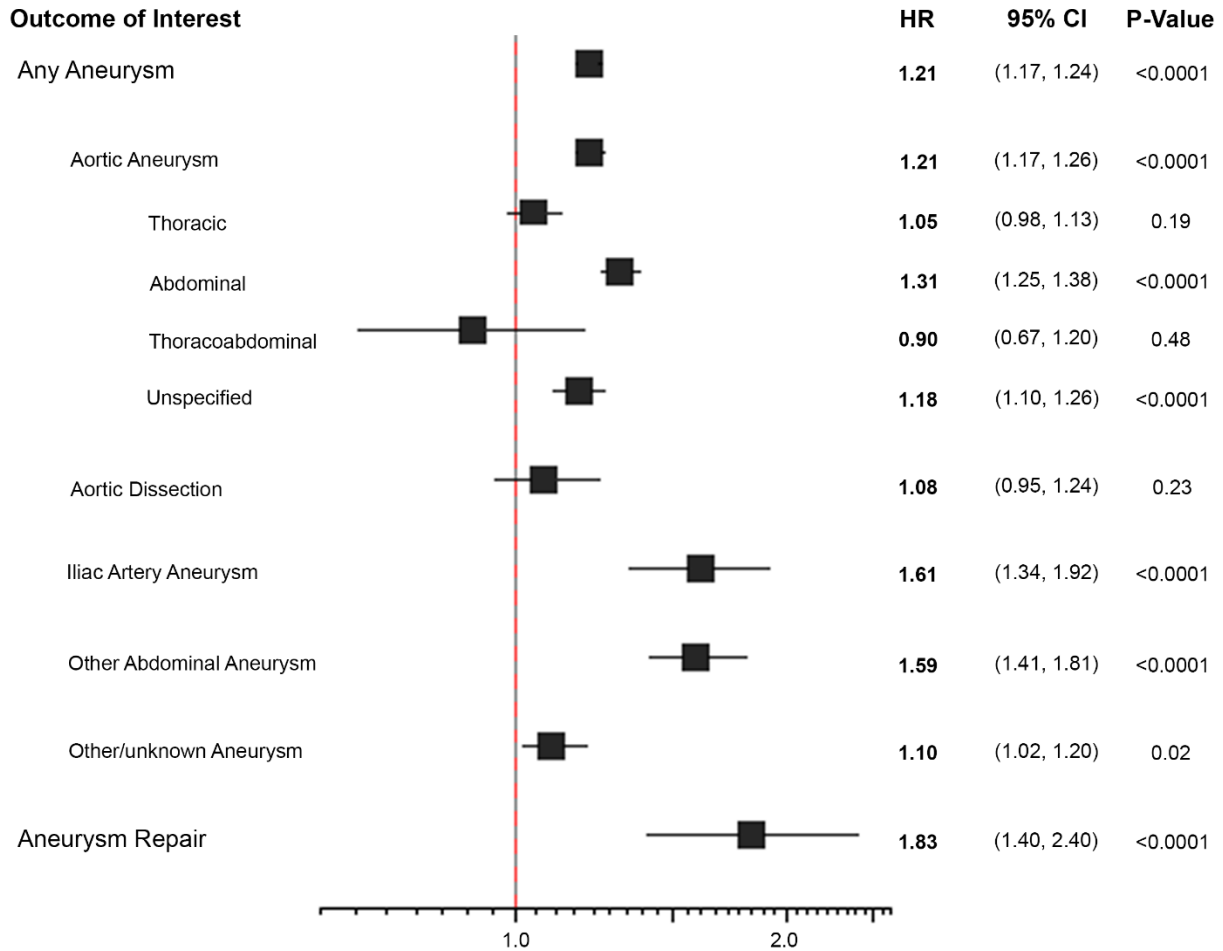

### eFigure 3. Association Between Fluoroquinolone Use and 90-Day Incidence of Aneurysm Formations Stratified by Age

Effect of fluoroquinolone use, compared to active comparators, on 90-day incidence of aneurysm stratified by age. Inverse-probability of treatment weights were used to account for potential confounding; weights and repeated observations were accounted for using robust sandwich estimators. Wald Chi-square test assessing potential effect measure modification by age. \*P-values comparing age groups.

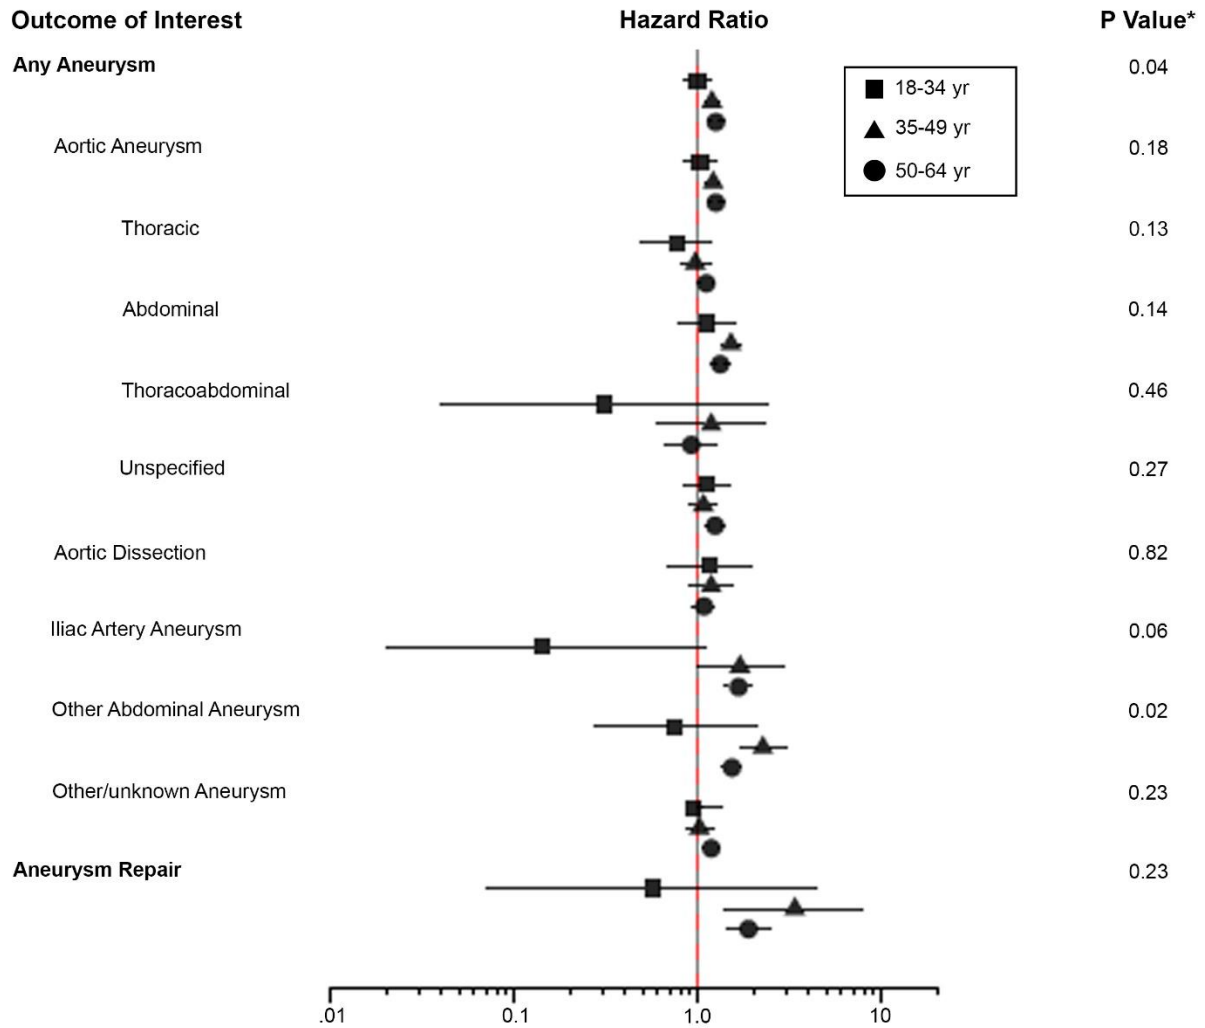

### eFigure 4. Association Between Fluoroquinolone Use and 90-Day Incidence of Aneurysm Formations Stratified by Sex

Effect of fluoroquinolone use, compared to active comparators, on 90-day incidence of aneurysm stratified by sex. Inverse-probability of treatment weights were used to account for potential confounding; weights and repeated observations were accounted for using robust sandwich estimators. Wald Chi-square test assessing potential effect measure modification by sex (i.e., is impact of FQ, compared to active comparator, different in females and males). \*P-value is comparing hazard ratios of males to females.

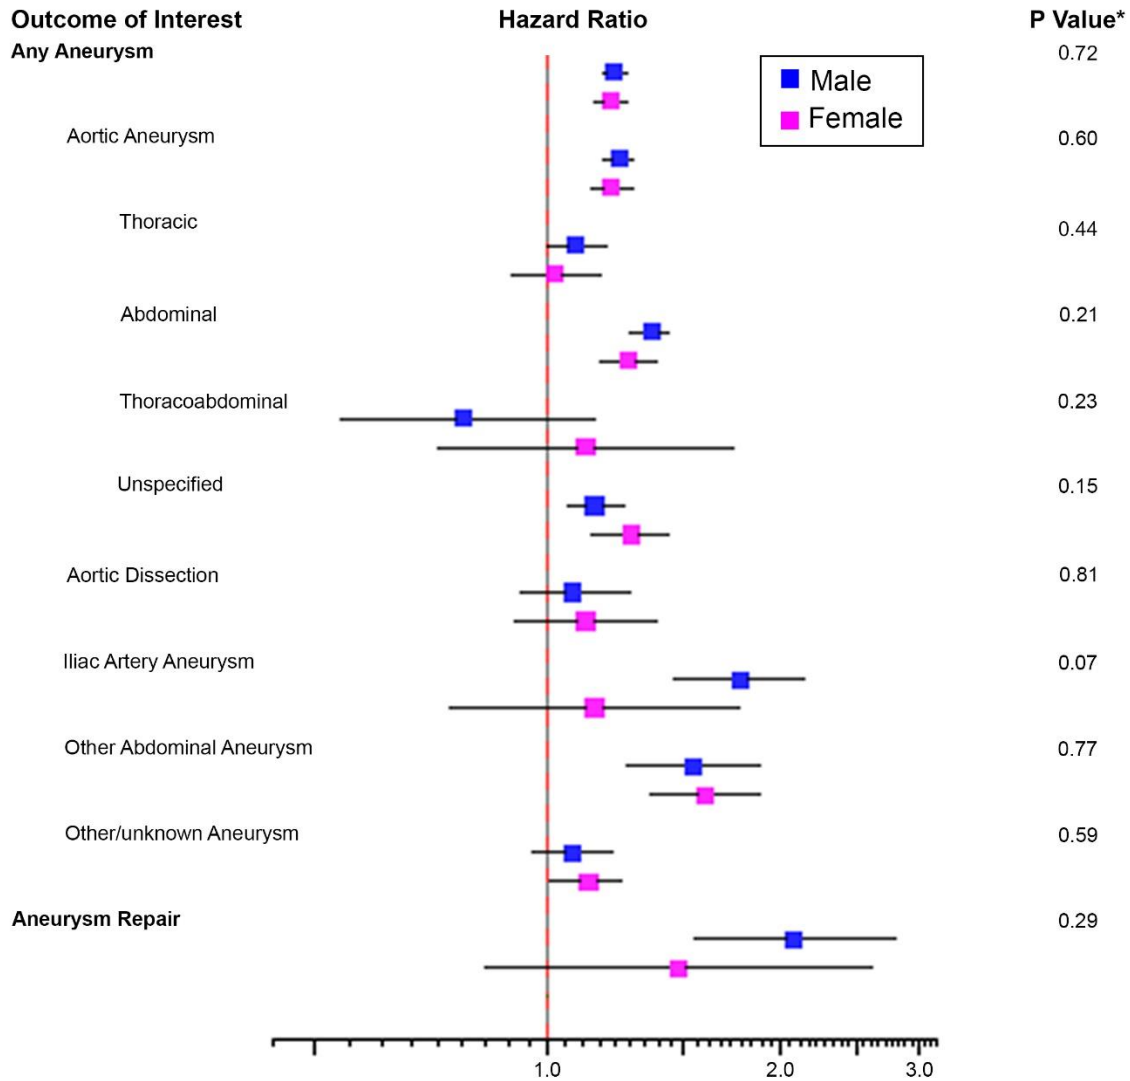

### eFigure 5. Association Between Fluoroquinolone Use and 90-Day Incidence of Aneurysm Formations Stratified by Diabetes Status

Effect of fluoroquinolone use, compared to active comparators, on 90-day incidence of aneurysm stratified by diabetes status. Inverse-probability of treatment weights were used to account for potential confounding; weights and repeated observations were accounted for using robust sandwich estimators. Wald Chi-square test assessing potential effect measure modification by diabetes status. \*P-value comparing at each sub-category level between disease severity. \*\*Thoracoabdominal Aortic Aneurysms were not able to be analyzed at this level due to low outcome incidence.

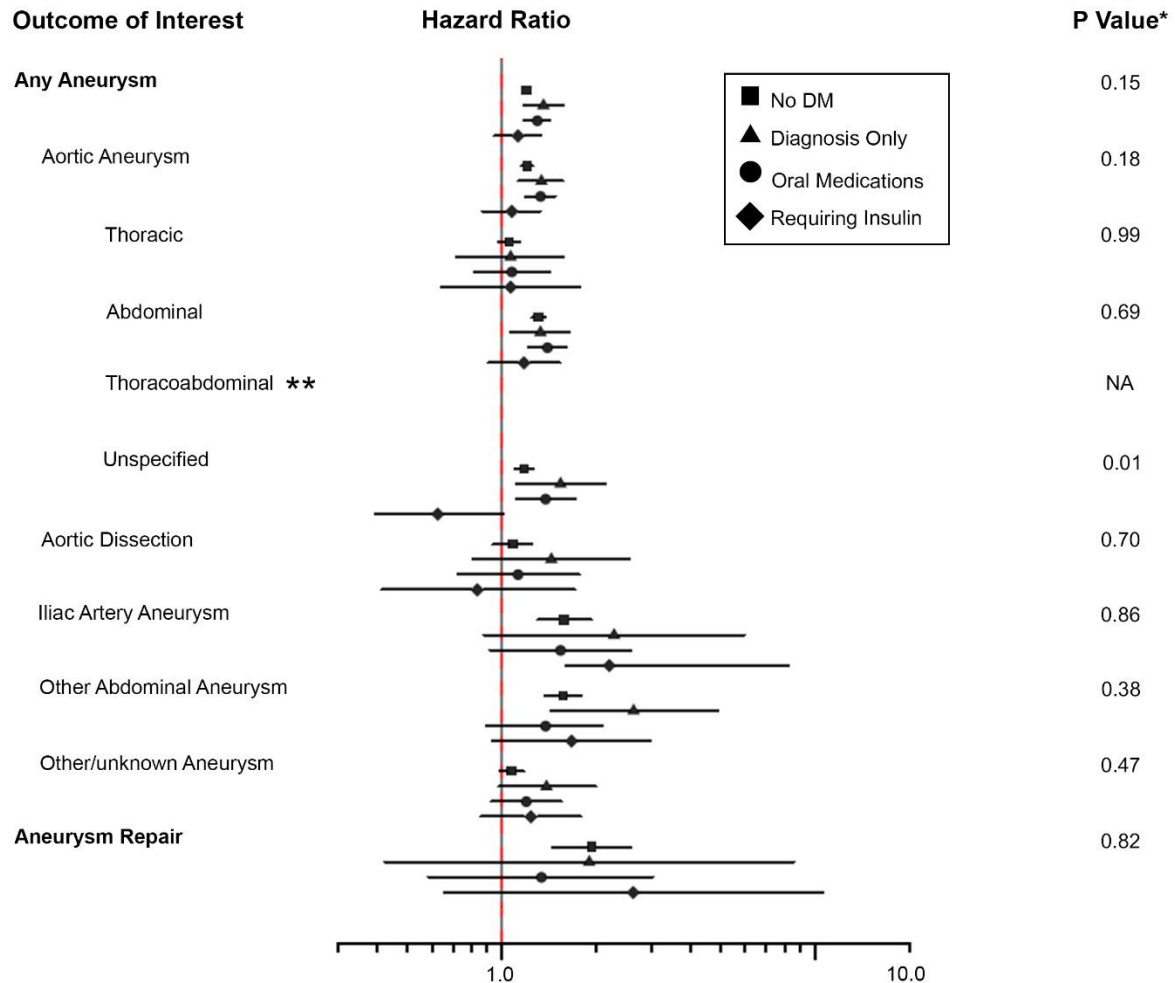

### Figure 6. Association Between Fluoroquinolone Use and 90-Day Incidence of Aneurysm Formations Stratified by Hypertension Status

Effect of fluoroquinolone use, compared to active comparators, on 90-day incidence of aneurysm stratified by hypertension status. Inverse-probability of treatment weights were used to account for potential confounding; weights and repeated observations were accounted for using robust sandwich estimators. Wald Chi-square test assessing potential effect measure modification by hypertension status. \*P-value comparing at each sub-category level between tiers of disease severity. \*\*Thoracoabdominal Aortic Aneurysms were not able to be analyzed at this level due to low cell counts across groups.

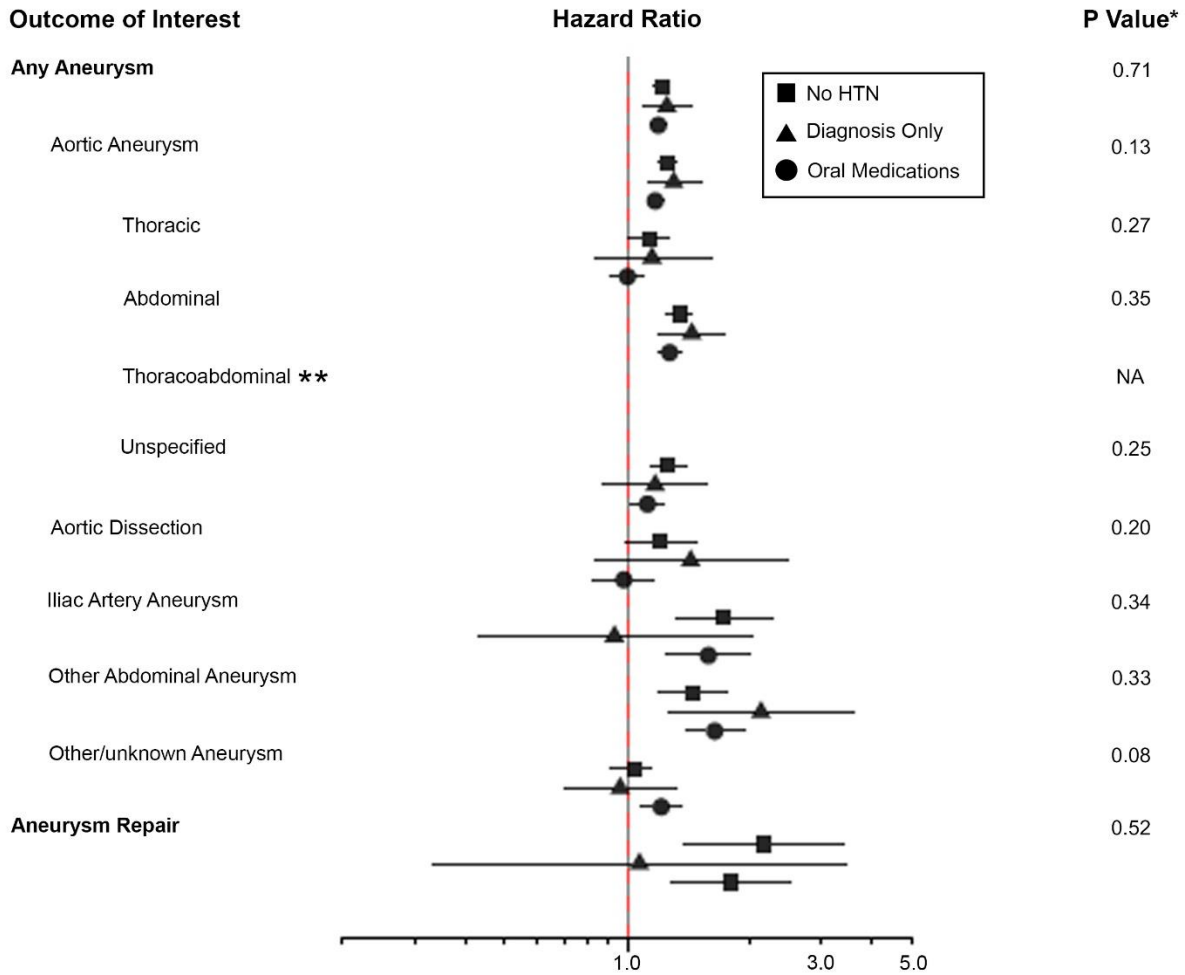



### eFigure 7. Association Between Fluoroquinolone Use and 90-Day Incidence of Aneurysm Formations Stratified by Hyperlipidemia Status

Effect of fluoroquinolone use, compared to active comparators, on 90-day incidence of aneurysm (including aortic dissection) stratified by hyperlipidemia status. Inverse-probability of treatment weights were used to account for potential confounding; weights and repeated observations were accounted for using robust sandwich estimators. Wald Chi-square test assessing potential effect measure modification by hyperlipidemia status. \*P-value comparing at each sub-category level between tiers of disease severity.

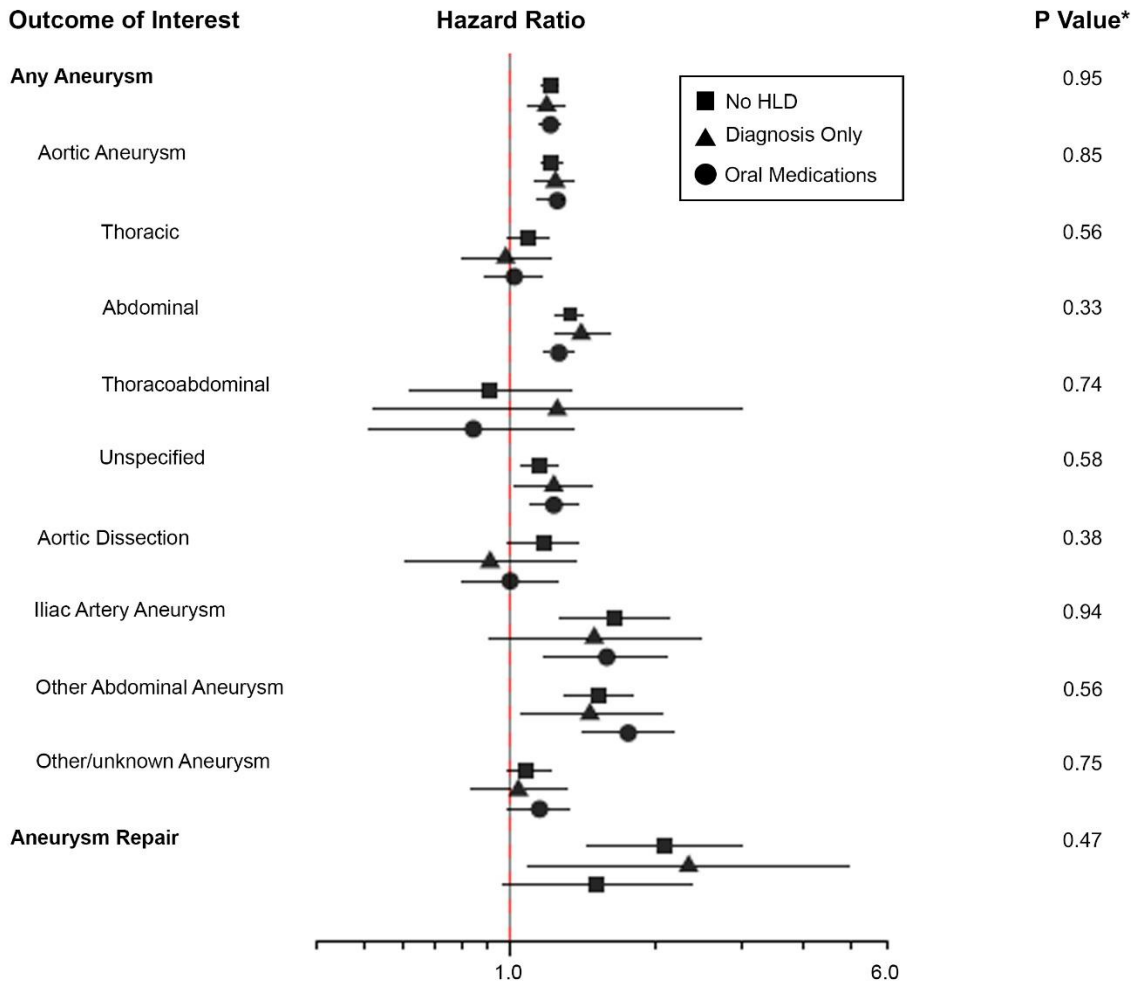

Supplement: jamasurg-e206165-s001.pdf [file jamasurg-e206165-s001.pdf]
